# Supplementary material for: Facile synthesis of 2,5-bis(silyl)selenophene-1,1-dioxide and its photophysical properties
Source: Royal Society of Chemistry journal article supplement (doi:10.1039/c6nj01886f), 2016-01-01
Supplement: c6nj01886f1.pdf [file c6nj01886f1.pdf]

## Supplementary Information

### **Facile Synthesis of a 2,5-Bis(silyl)selenophene-1,1-dioxide and its Photophysical Properties**

Toshiyuki Masuda,<sup>a</sup> Yusuke Inagaki,<sup>a</sup> Hiroyuki Momma,<sup>b</sup> Eunsang Kwon,<sup>b</sup> and Wataru Setaka<sup>\*,a</sup>

<sup>a</sup> *Division of Applied Chemistry, Faculty of Urban Environmental Sciences, Tokyo Metropolitan University, 1-1 Minami-Osawa, Hachioji, Tokyo 192-0397, Japan*

<sup>b</sup> *Research and Analytical Center for Giant Molecules, Graduate School of Science, Tohoku University, Aoba-ku, Sendai 980-8578, Japan*

#### **1. Copies of Spectra for All New Compounds**

#### **2. Details of Kinetic Study for the Oxidation**

#### **3. Details of DSC Analysis**

#### **4. Details of X-ray Crystallography**

#### **5. Details of Theoretical Calculations**

#### **6. Details of Solid-State Fluorescence Study**

# 1. Copies of Spectra for All New Compounds

## a. 2,5-Bis(trimethylsilyl)selenophene-1,1-dioxide (5)

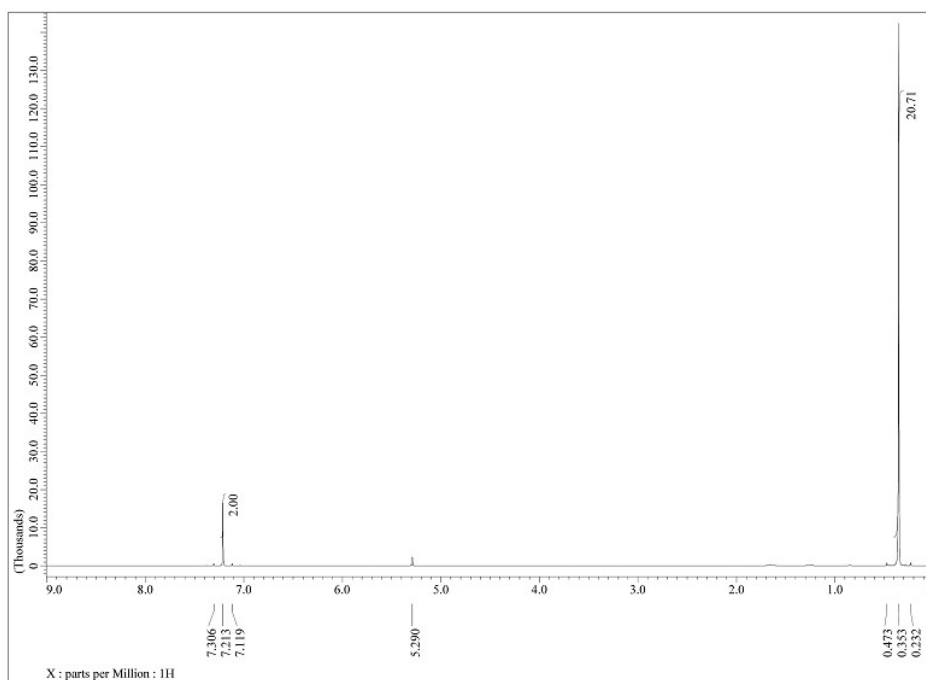

Fig. S1. <sup>1</sup>H NMR spectrum of 2,5-Bis(trimethylsilyl)selenophene-1,1-dioxide (5) in CD<sub>2</sub>Cl<sub>2</sub>.

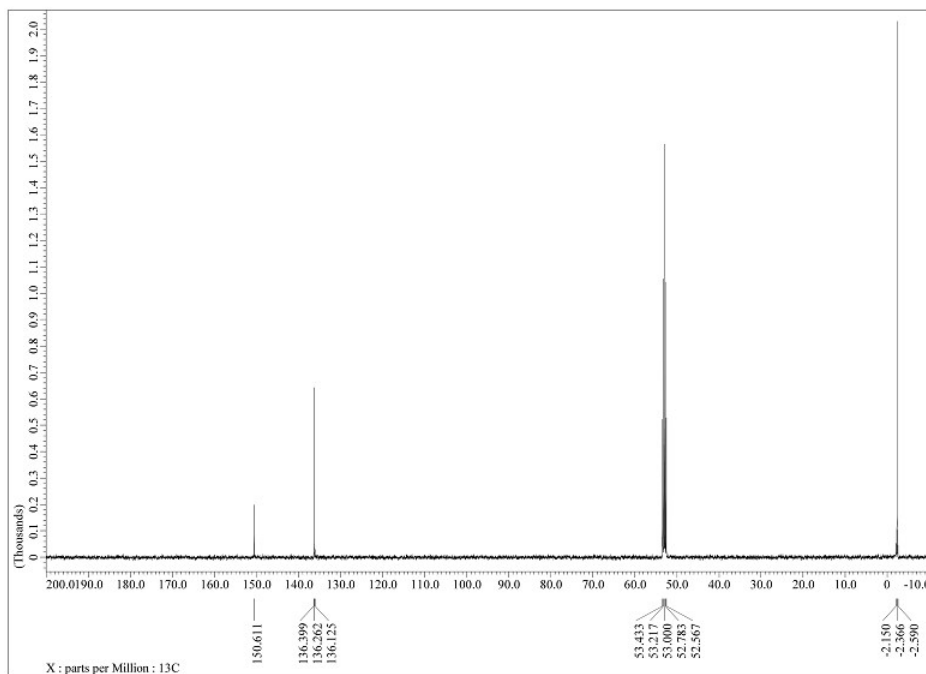

Fig. S2. <sup>13</sup>C NMR spectrum of 2,5-Bis(trimethylsilyl)selenophene-1,1-dioxide (5) in CD<sub>2</sub>Cl<sub>2</sub>.

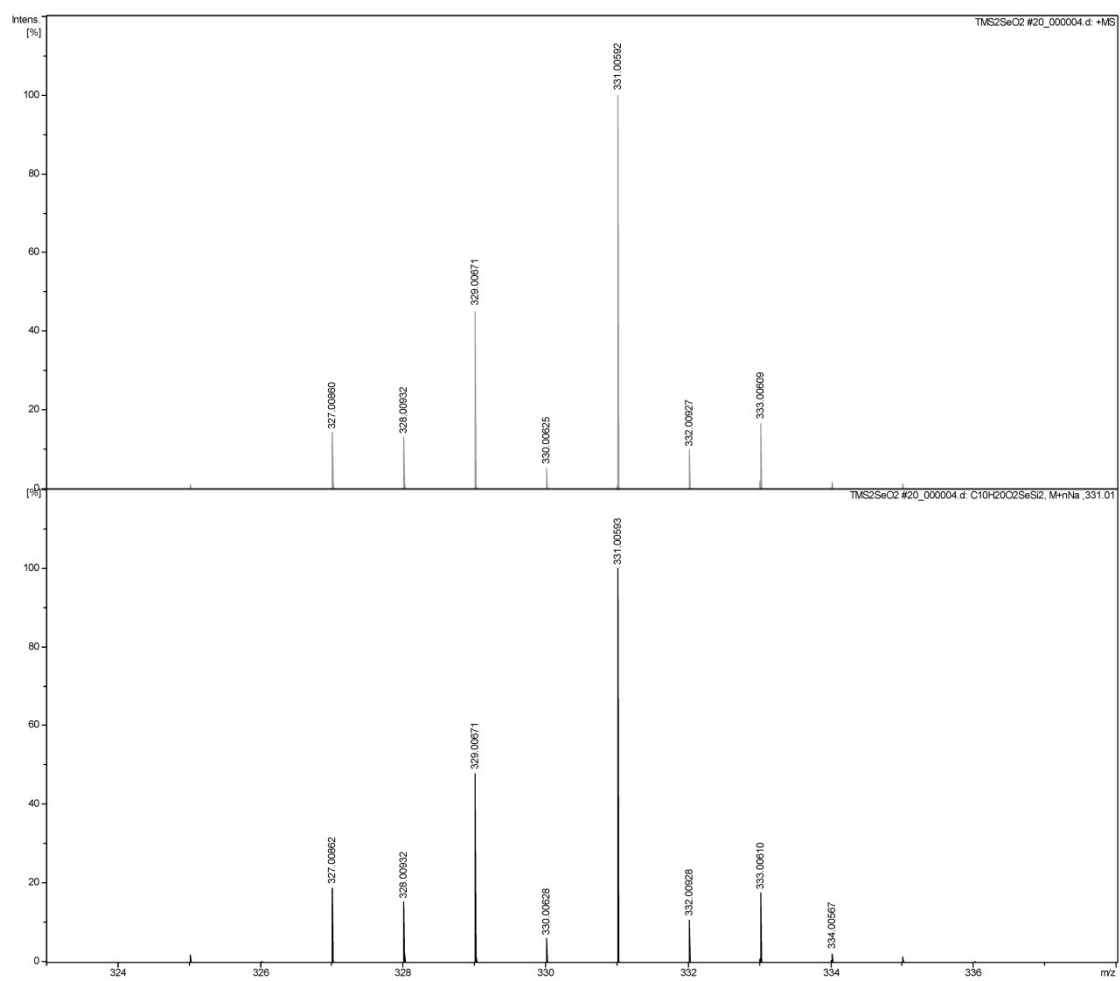

**Fig. S3.** HRMS(ESI, positive) spectrum of 2,5-Bis(trimethylsilyl)selenophene-1,1-dioxide (**5**): top; obsd., bottom; calcd.

**b. 2,5-Bis(trimethylsilyl)selenophene (6)**

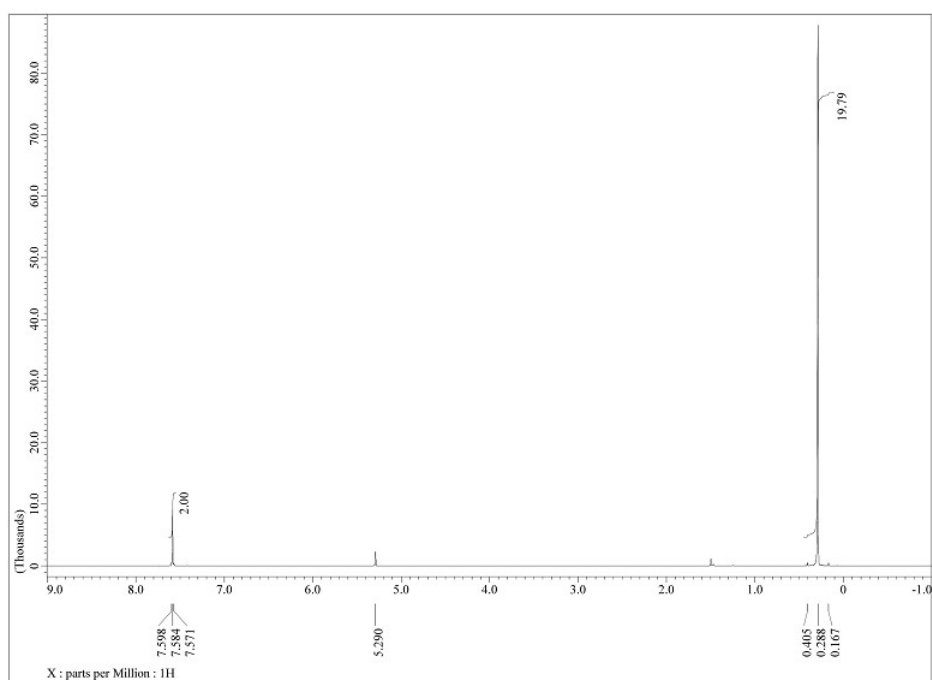

**Fig. S4.** <sup>1</sup>H NMR spectrum of 2,5-Bis(trimethylsilyl)selenophene (6) in CD<sub>2</sub>Cl<sub>2</sub>.

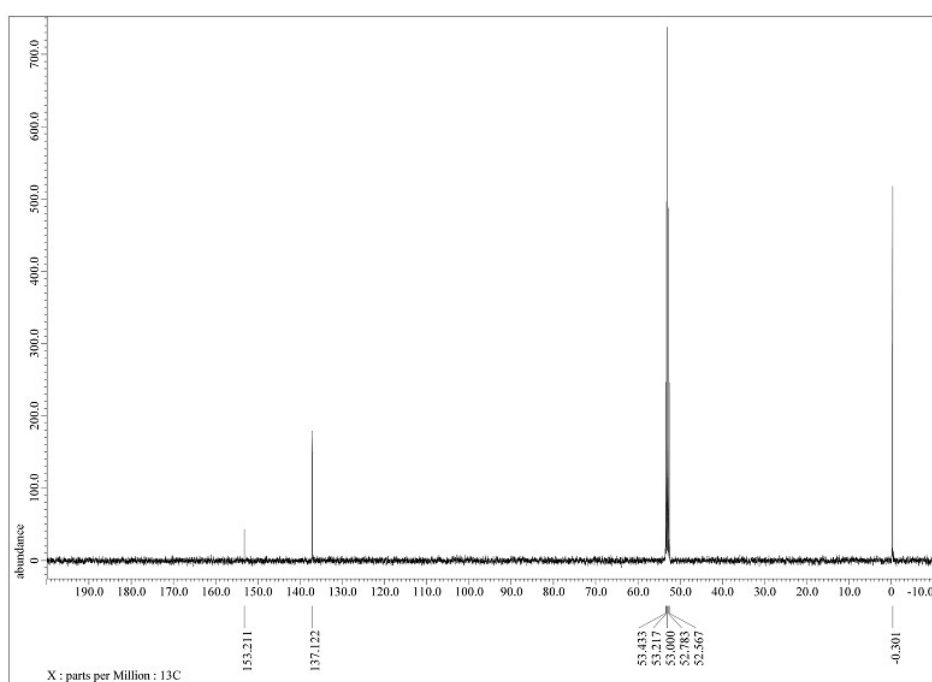

**Fig. S5.** <sup>13</sup>C NMR spectrum of 2,5-Bis(trimethylsilyl)selenophene (6) in CD<sub>2</sub>Cl<sub>2</sub>.

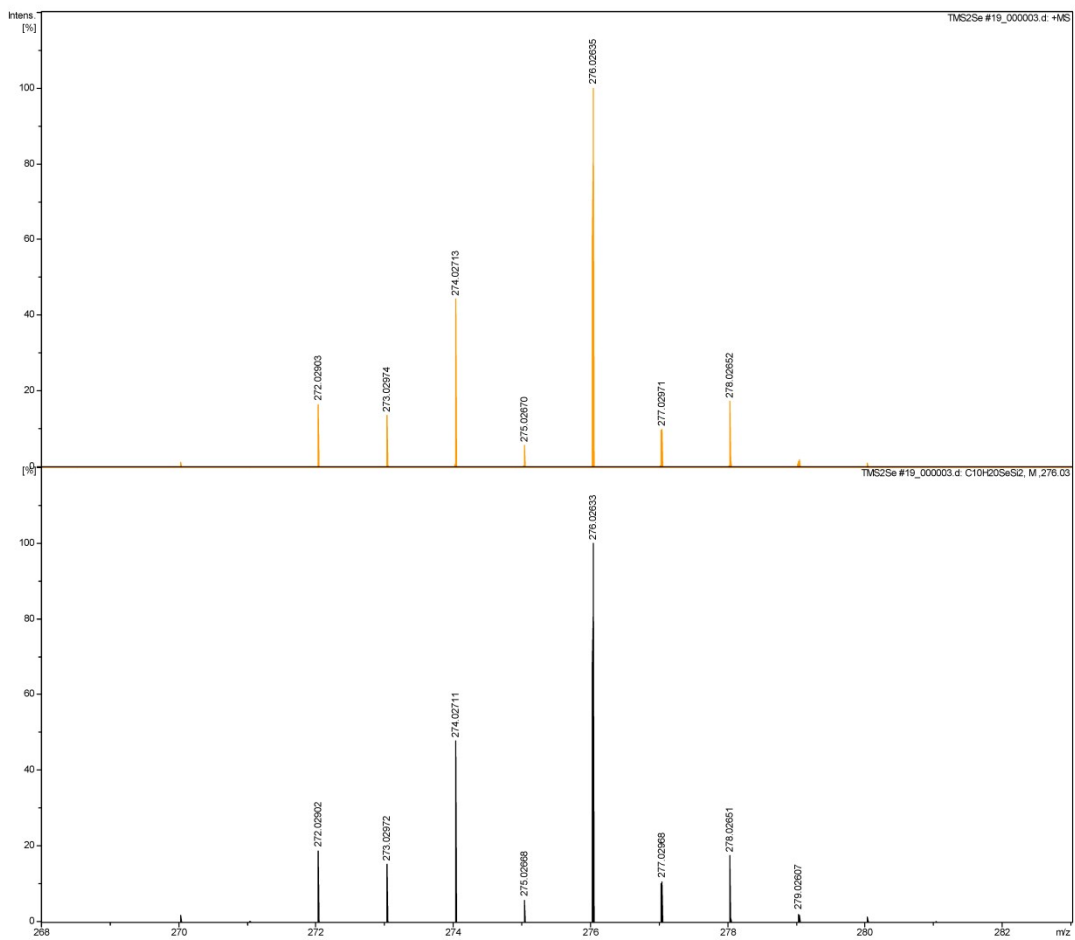

**Fig. S6.** HRMS(APCI, positive) spectrum of 2,5-Bis(trimethylsilyl)selenophene (**6**): top; obsd., bottom; calcd.

### c. 2,5-Bis(dimethylsilyl)selenophene (7)

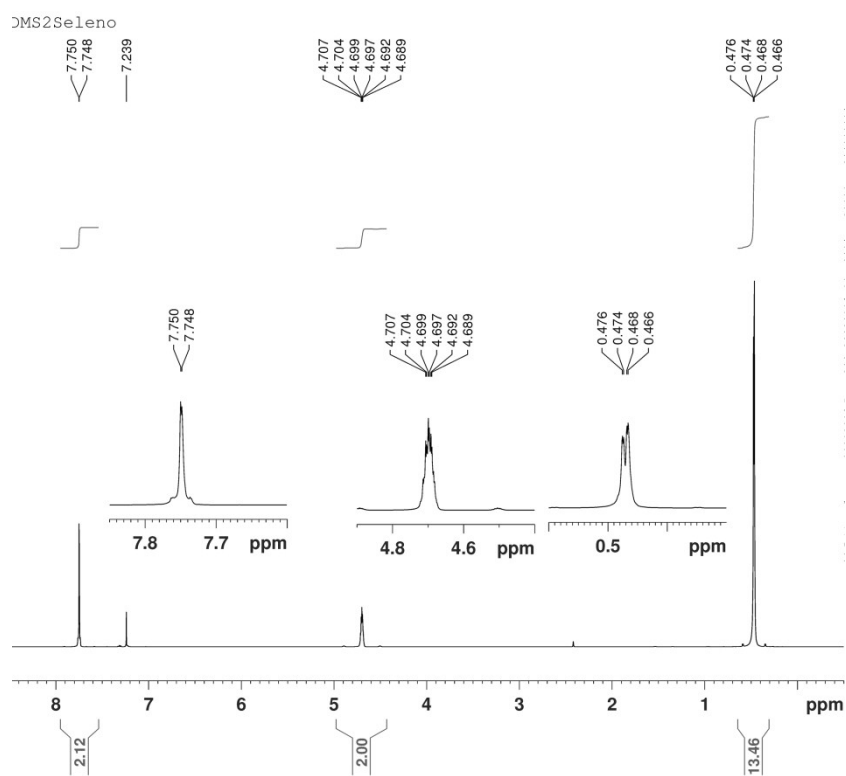

**Fig. S7.**  $^1\text{H}$  NMR spectrum of 2,5-Bis(dimethylsilyl)selenophene (7) in  $\text{CDCl}_3$ .

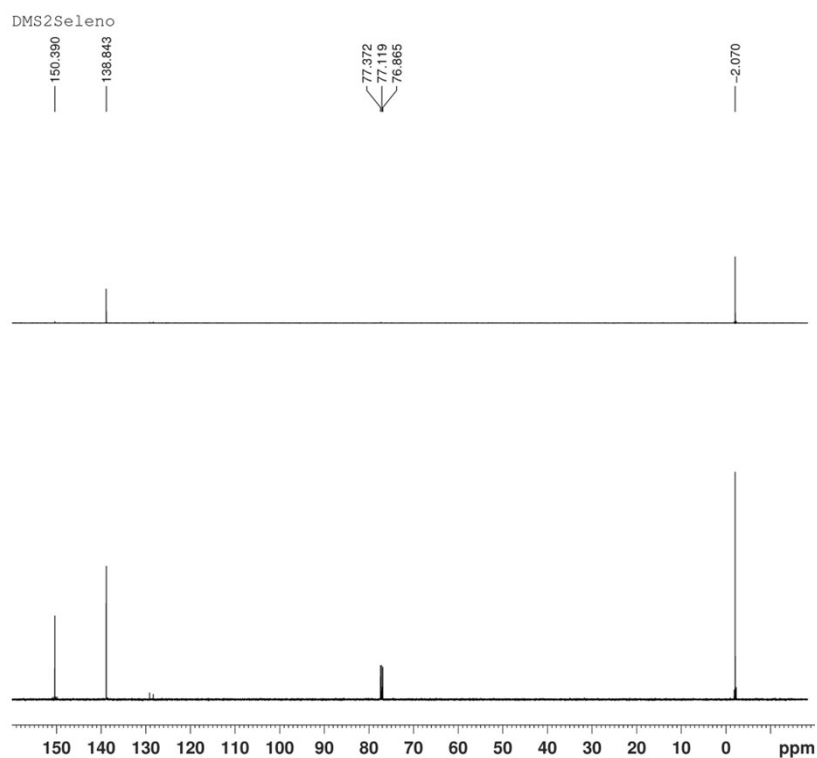

**Fig. S8.**  $^{13}\text{C}$  NMR spectrum of 2,5-Bis(dimethylsilyl)selenophene (7) in  $\text{CDCl}_3$ .

測定データ名: #01 HMe2SiSeleno  
 作成条件: 平均(MS[1]) 経過時間: 0.01..3.00

実験日時: 2016/08/10 17:41:36  
 イオン化モード: FD+(eIFI)

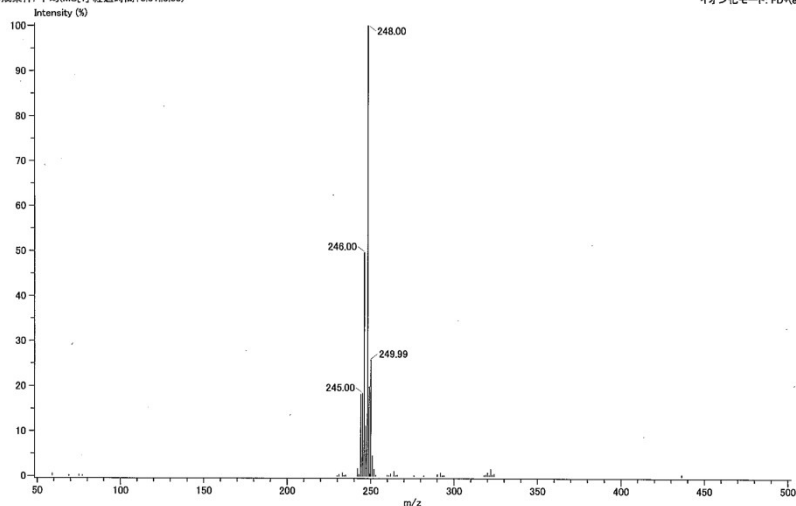

データ: #01 HMe2SiSeleno  
 試料名:  
 説明:  
 イオン化モード: FD+(eIFI)  
 処理履歴: m/z軸決定[ピーク検出[重心,30,面積];平滑化[S1];ベース補正[];平均(MS[1]) 0.01..3.00)  
 電荷数: 1  
 元素:  $^{12}\text{C}:0..8$ ,  $^1\text{H}:0..16$ ,  $^{80}\text{Se}:0..1$ ,  $^{28}\text{Si}:0..2$

測定日時: 2016/08/10 17:41:36  
 測定者: AccuTOF  
 質量校正データ: Pos\_800  
 作成日時: 2016/08/10 17:59:50  
 作成者: AccuTOF  
 不飽和数: 0.0..10.0 (端数: 両方)

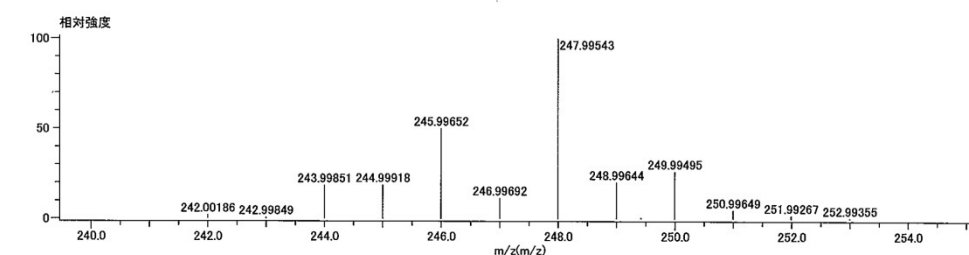

| 質量        | 強度       | 計算質量      | 質量差<br>mmu | 質量差<br>ppm | 推定組成式                                                       | 不飽和数 |
|-----------|----------|-----------|------------|------------|-------------------------------------------------------------|------|
| 247.99543 | 41470.26 | 247.99556 | -0.15      | -0.60      | $^{12}\text{C}_8^1\text{H}_{16}^{80}\text{Se}^1\text{Si}_2$ | 4.0  |

**Fig. S9.** HRMS(FD/FI, positive) spectrum of 2,5-Bis(dimethylsilyl)selenophene (7): top; a whole spectrum., bottom; an enlarged spectra.

d. 2,5-Bis(phenyldimethylsilyl)selenophene (9)

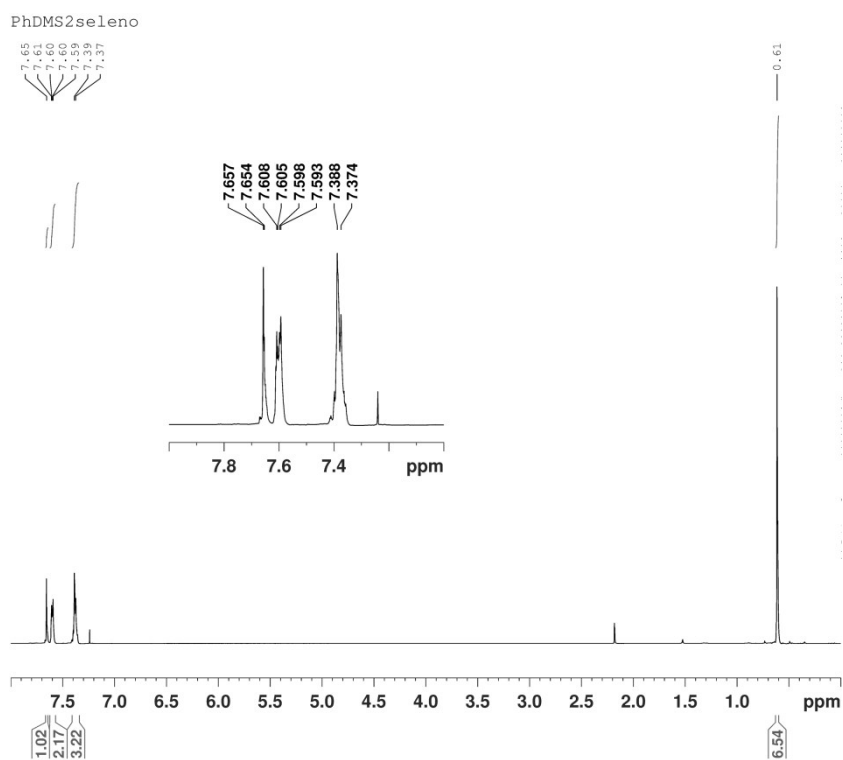

Fig. S10.  $^1\text{H}$  NMR spectrum of 2,5-Bis(phenyldimethylsilyl)selenophene (9) in  $\text{CDCl}_3$ .

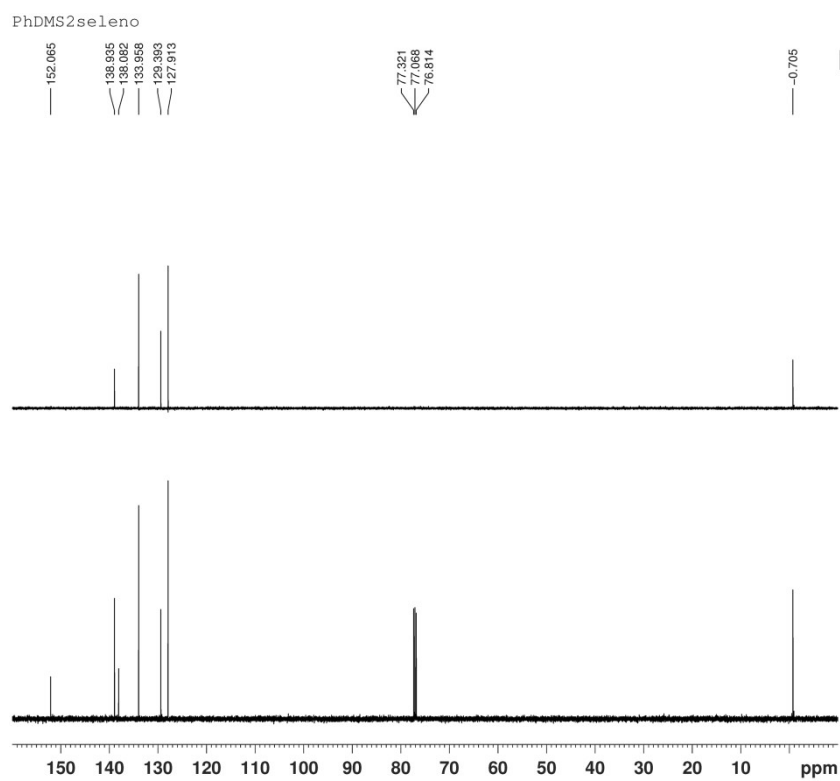

Fig. S11.  $^{13}\text{C}$  NMR spectrum of 2,5-Bis(phenyldimethylsilyl)selenophene (9) in  $\text{CDCl}_3$ .



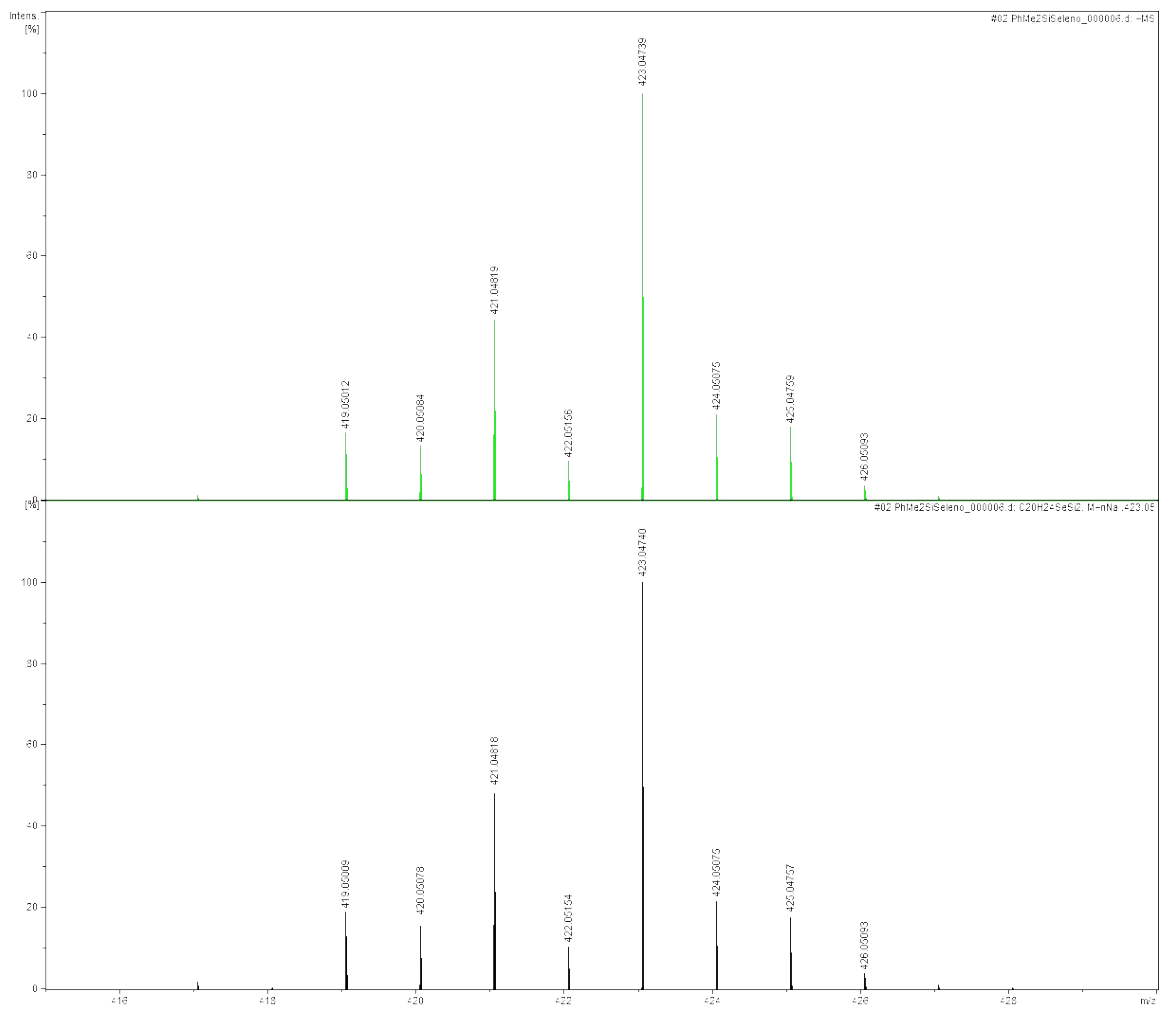

**Fig. S12.** HRMS(ESI, positive) spectrum of 2,5-Bis(phenyldimethylsilyl)selenophene (**9**): top; obsd., bottom; calcd.

e. 2,5-Bis(phenyldimethylsilyl)selenophene-1,1-dioxide (**10**)

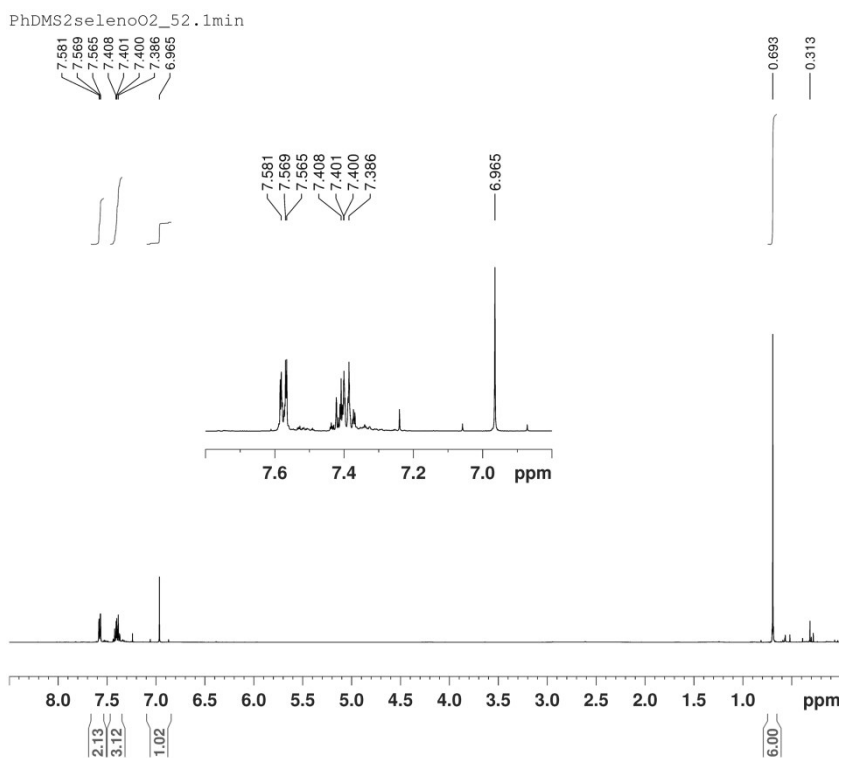

Fig. S13.  $^1\text{H}$  NMR spectrum of 2,5-Bis(phenyldimethylsilyl)selenophene-1,1-dioxide (**10**) in  $\text{CDCl}_3$ .

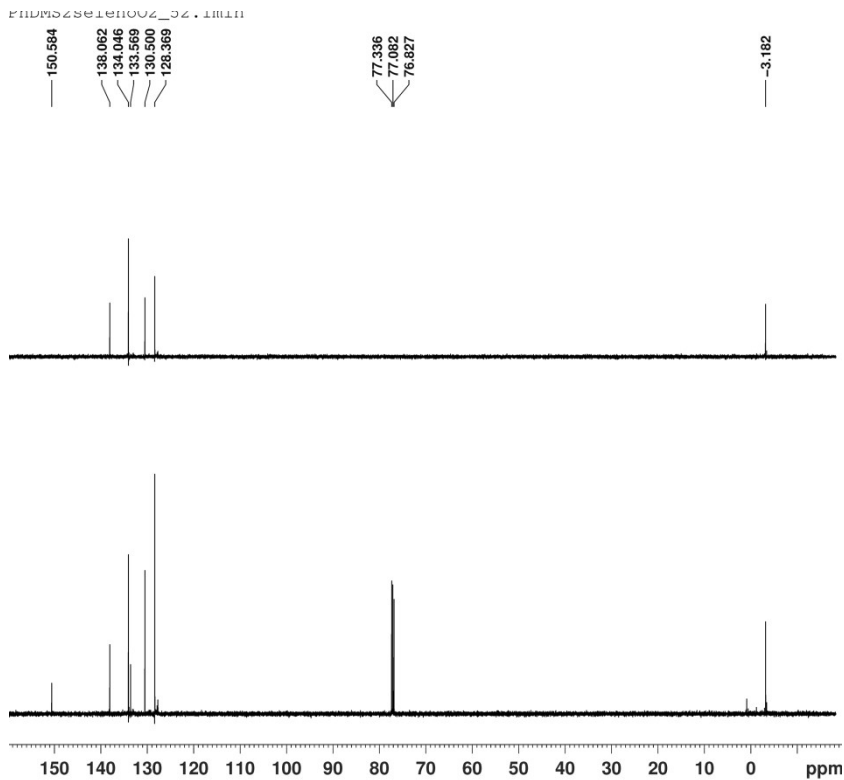

Fig. S14.  $^{13}\text{C}$  NMR spectrum of 2,5-Bis(phenyldimethylsilyl)selenophene-1,1-dioxide (**10**) in  $\text{CDCl}_3$ .

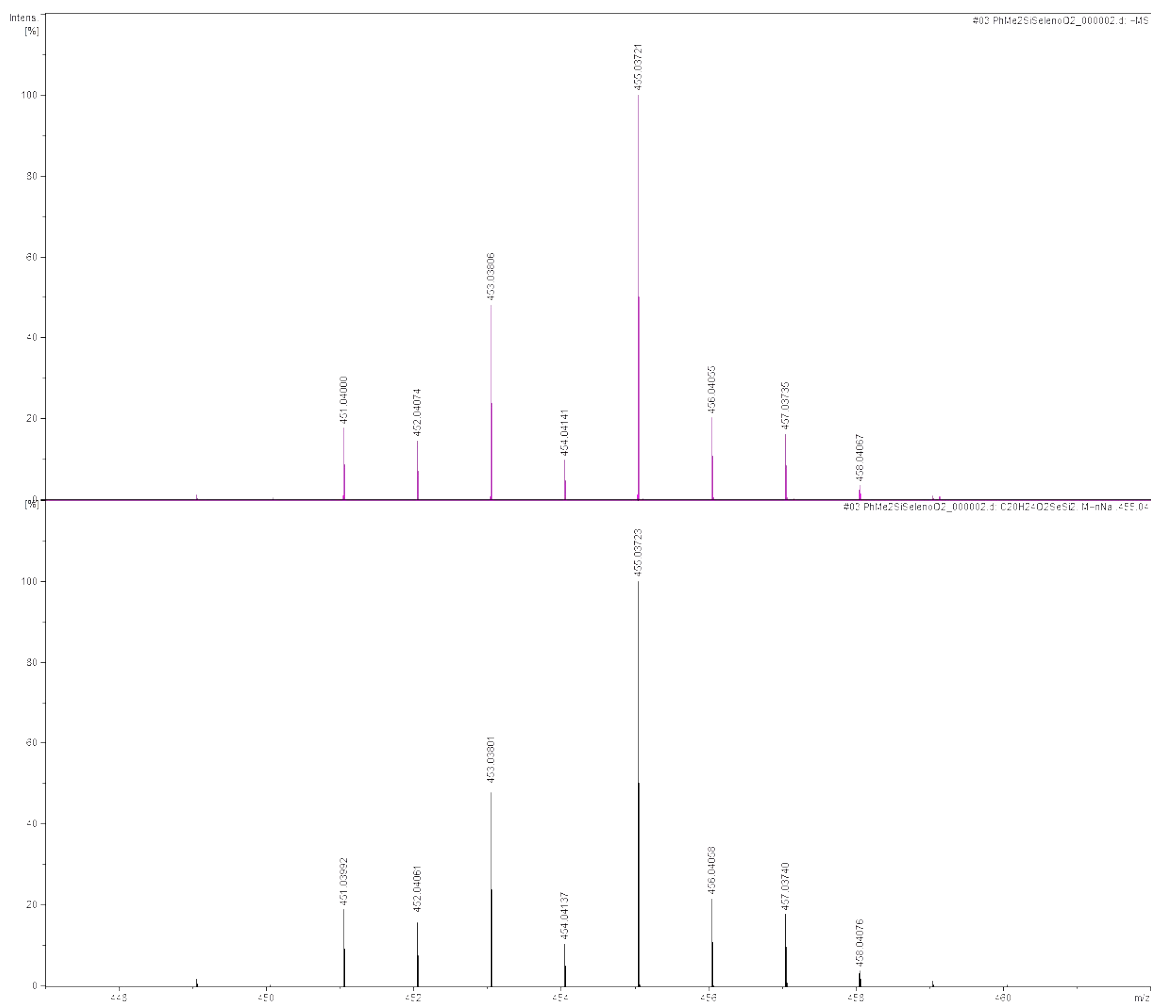

**Fig. S15.** HRMS(ESI, positive) spectrum of 2,5-Bis(phenyldimethylsilyl)selenophene-1,1-dioxide (**10**): top; obsd., bottom; calcd.

## 2. Details of Kinetic Study for the Oxidation

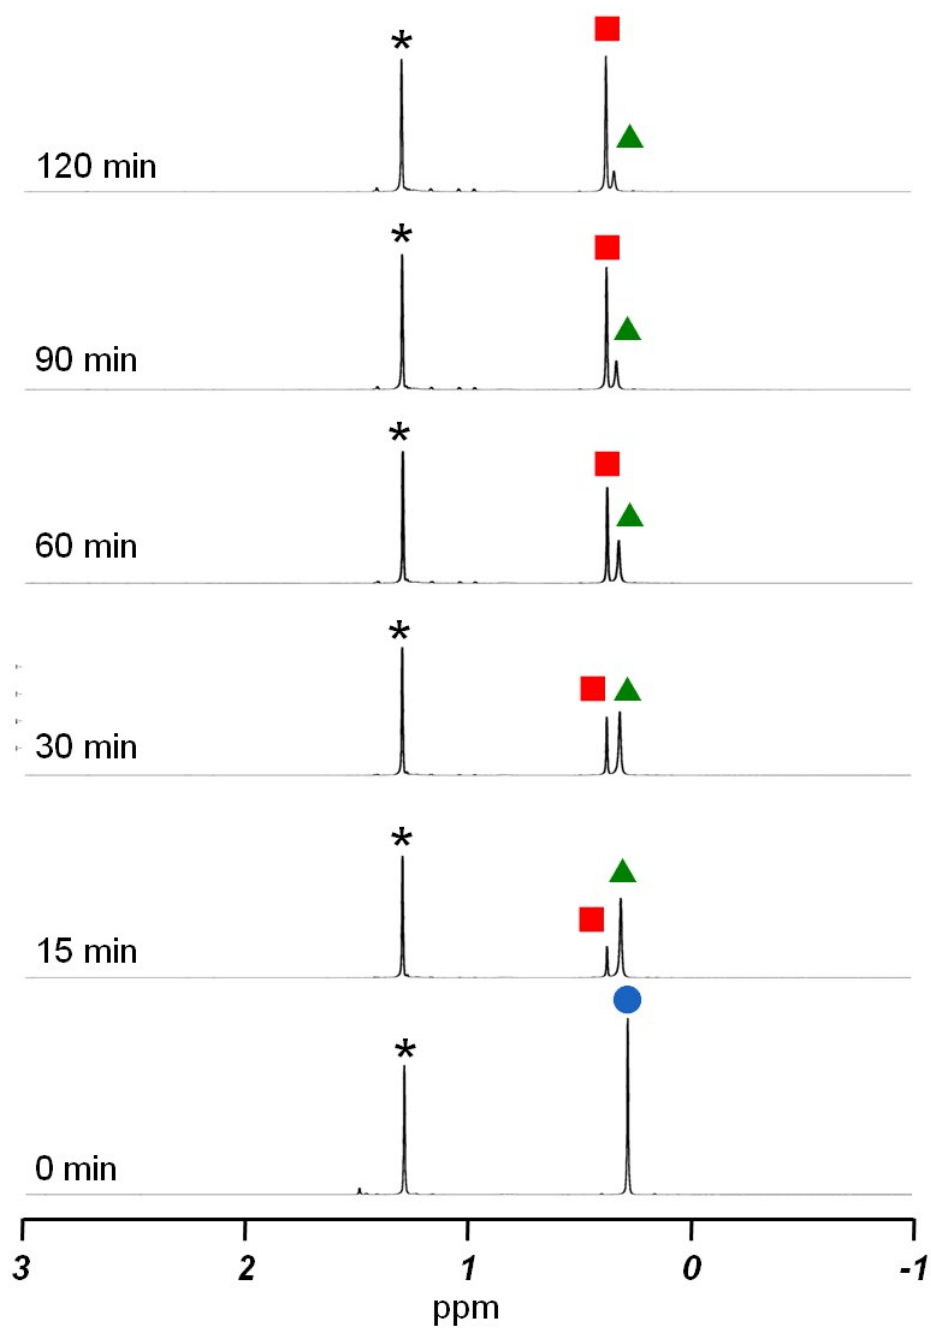

**Fig. S16.** Oxidation reaction of selenophene (**6**) traced by  $^1\text{H}$  NMR spectra: at 298 K: [*A*] (selenophene, blue cycle); [*B*] (monoxide, green triangle); and [*C*] (dioxide, red square) (Asterisks (\*) indicate signals of 1,3,5-tri-*tert*-butylbenzene as internal standard.).

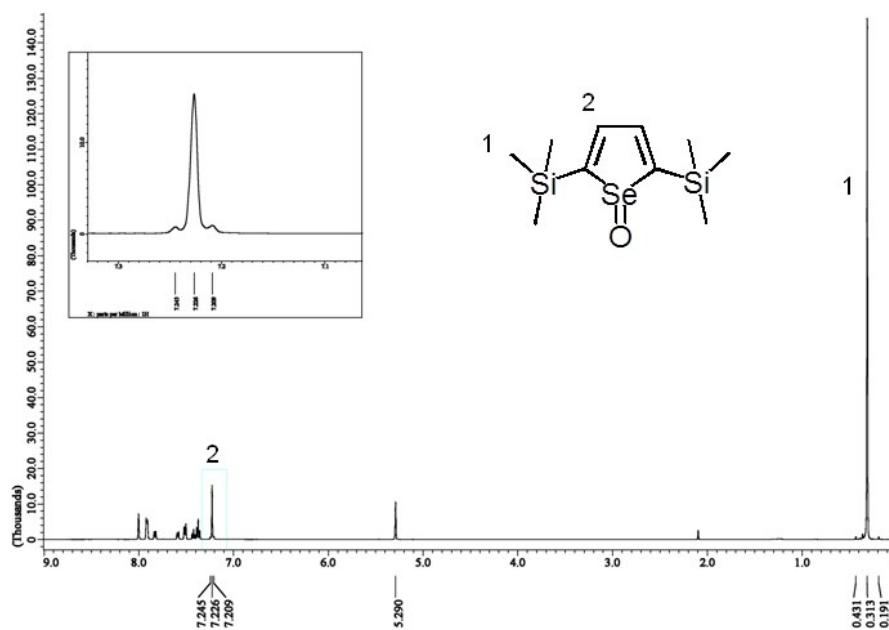

Fig. S17.  $^1\text{H}$  NMR spectrum of temporary observed selenophene monooxide.

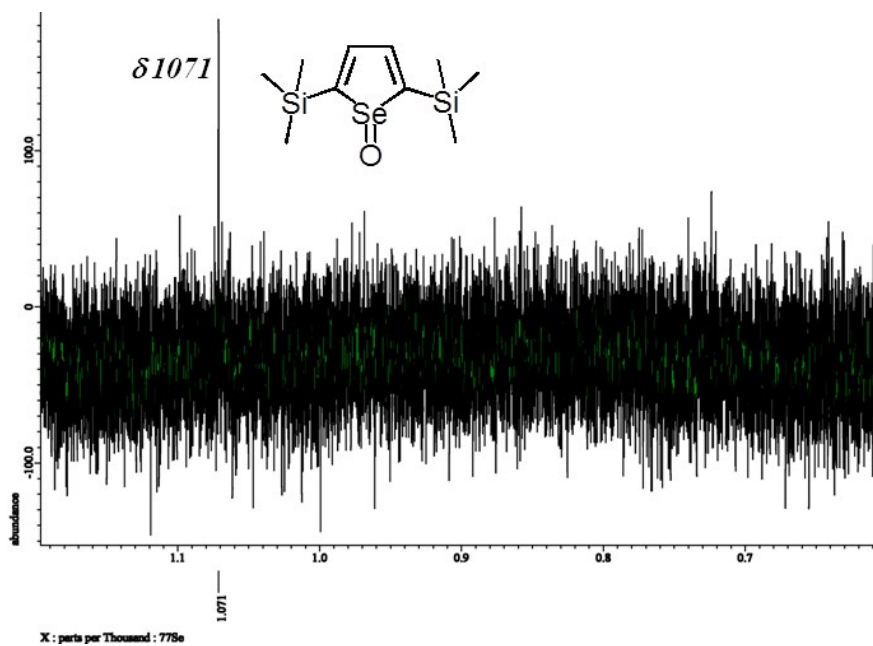

Fig. S18.  $^{77}\text{Se}$  NMR spectrum of temporary observed selenophene monooxide.

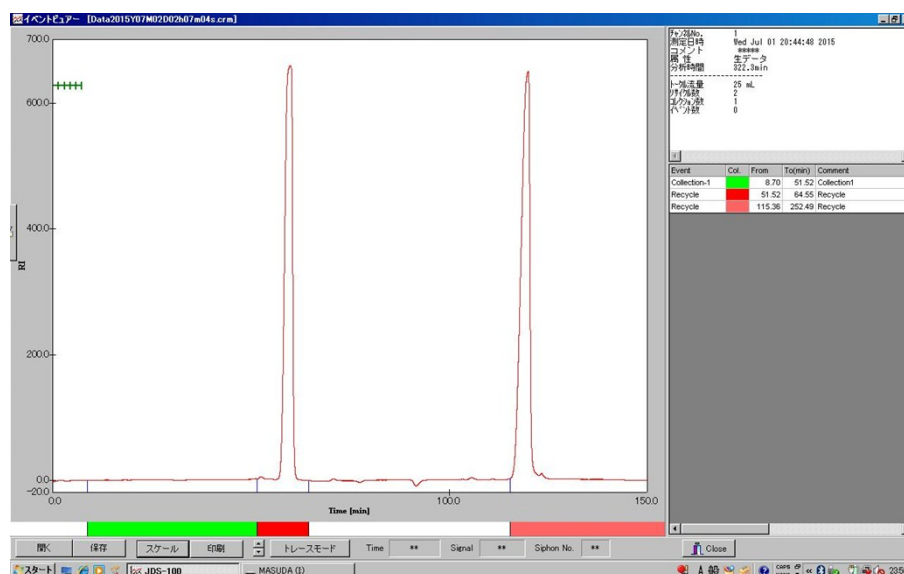

**Fig. S19.** A recycling GPC chart (RI detector, 2 cycles) for the analysis of the crude product(s) after hydrolysis in the oxidation of 2,5-bis(dimethylsilyl)selenophene (**7**) with *m*CPBA. The single peak indicates a fraction of **7**.

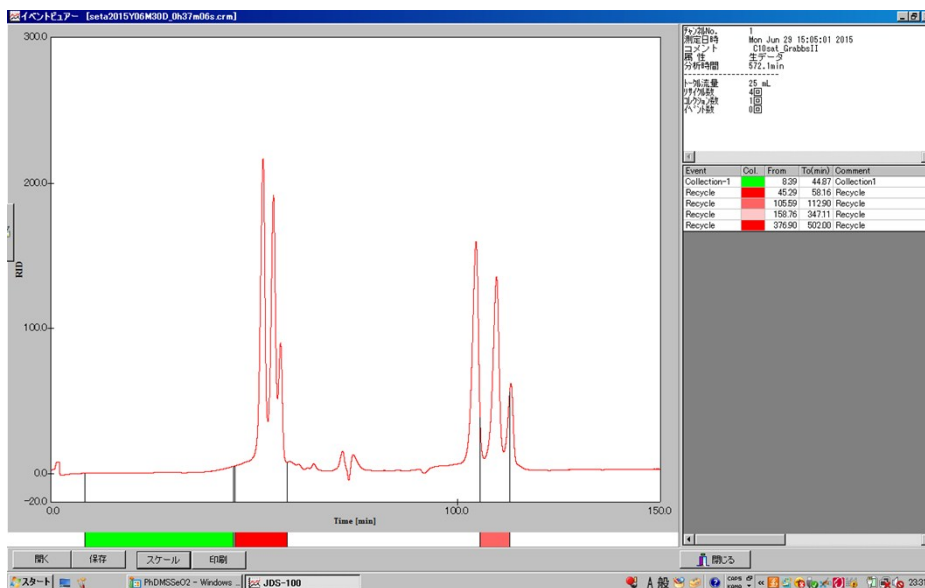

**Fig. S20.** A recycling GPC chart (RI detector, 2 cycles) for the analysis of the crude product(s) after hydrolysis in the oxidation of 2,5-bis(phenyldimethylsilyl)selenophene (**9**) with *m*CPBA. The signals at 52.1, 52.4, and 56.6 min were ascribed to the fractions of 2,5-bis(phenyldimethylsilyl)selenophene-1,1-dioxide (**10**), **9**, and PhMe<sub>2</sub>Si-O-SiMe<sub>2</sub>Ph, respectively.

### 3. Details of DSC Analysis

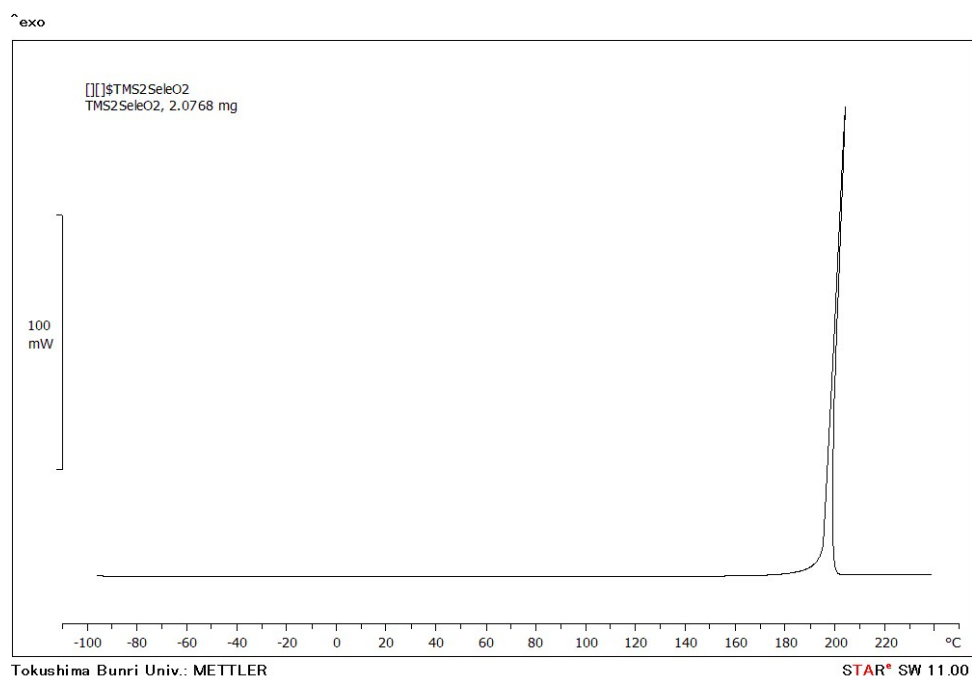

**Fig. S21.** DSC chart of powder of 2,5-Bis(trimethylsilyl)selenophene-1,1-dioxide (5).

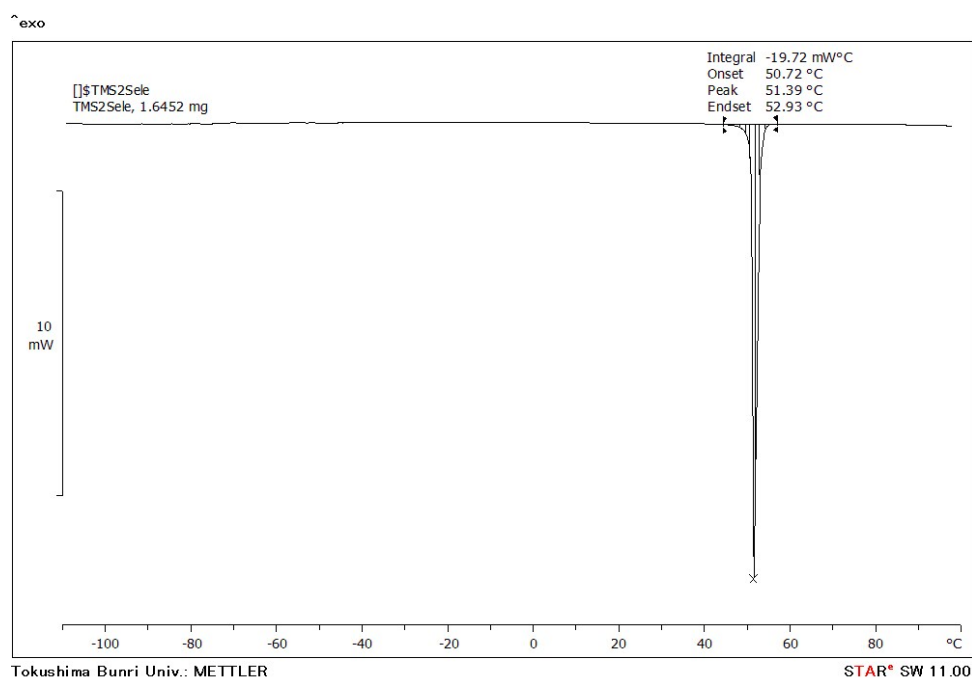

**Fig. S22.** DSC chart of powder of 2,5-Bis(trimethylsilyl)selenophene (6).

## 4. Details of X-ray Crystallography

**Table S1.** Crystal Data of **5** and **6**

|                                      | <b>5</b>                           | <b>6</b>                           |                          |
|--------------------------------------|------------------------------------|------------------------------------|--------------------------|
| CCDC #                               | 1472766                            | 1472767                            |                          |
| Compound Name                        | Selenophene-1,1-dioxide            | Selenophene                        |                          |
| Empirical formula                    | C10H20O2SeSi2                      | C10H20SeSi2                        |                          |
| Cryst shape                          | prism                              | prism                              |                          |
| Cryst color                          | colorless                          | colorless                          |                          |
| Cryst size                           | 0.30 x 0.20 x 0.20 mm <sup>3</sup> | 0.40 x 0.40 x 0.10 mm <sup>3</sup> |                          |
| Formula weight / g mol <sup>-1</sup> | 370.40                             | 275.40                             |                          |
| Crystal system                       | Tetragonal                         | Monoclinic                         |                          |
| Space group                          | P-4                                | Pmmn                               |                          |
| Z                                    | 2                                  | 4                                  |                          |
| Temperature / K                      | 100                                | 100                                |                          |
| Cell parameter                       | a                                  | 11.0742(16) Å                      | 14.666(4) Å              |
|                                      | b                                  | 11.0742(16) Å                      | 14.776(4) Å              |
|                                      | c                                  | 6.4127(9) Å                        | 6.4741(16) Å             |
|                                      | α                                  | 90°                                | 90°                      |
|                                      | β                                  | 90°                                | 90°                      |
|                                      | γ                                  | 90°                                | 90°                      |
|                                      | V                                  | 786.4(3) Å <sup>3</sup>            | 1403.0(6) Å <sup>3</sup> |
| Calculated density                   | 1.298 Mg/m <sup>3</sup>            | 1.304 Mg/m <sup>3</sup>            |                          |
| F(000)                               | 316                                | 568                                |                          |
| Absorption coefficient               | 2.523 mm <sup>-1</sup>             | 2.810 mm <sup>-1</sup>             |                          |
| θ range for collecn (deg)            | 3.177 to 28.493°                   | 1.96 to 26.89°                     |                          |
| Index ranges                         | -11<=h<=14, -14<=k<=13, -          | -18<=h<=15, -17<=k<=18, -          |                          |
|                                      | 6<=l<=8                            | 8<=l<=4                            |                          |
| Reflections collected                | 4426                               | 6412                               |                          |
| Independent reflections              | 1826 [R(int) = 0.0261]             | 1550 [R(int) = 0.0359]             |                          |
| Completeness                         | 99.6 %                             | 99.9 %                             |                          |
| Goodness-of-fit on F <sup>2</sup>    | 0.945                              | 1.033                              |                          |
| Final R indices [I>2σ(I)]            | R1 = 0.0238, wR2 = 0.0709          | R1 = 0.0238, wR2 = 0.0587          |                          |
| R indices (all data)                 | R1 = 0.0240, wR2 = 0.0709          | R1 = 0.0270, wR2 = 0.0600          |                          |
| Largest diff. peak and hole          | 1.027 and -0.533 e.Å <sup>-3</sup> | 0.470 and -0.475 e.Å <sup>-3</sup> |                          |



## 5. Details of DFT Calculations

### a. Optimized Structure and Total Energy at B3LYP/6-31G(d) Level

#### I. Theoretical calculations of 2,5-Bis(trimethylsilyl)selenophene-1,1-dioxide (5)

total energy: = -3521.8754088 hartree (NImag = 0)

| Center Number | Atomic Number | Atomic Type | Coordinates (Angstroms) |           |           |
|---------------|---------------|-------------|-------------------------|-----------|-----------|
|               |               |             | X                       | Y         | Z         |
| 1             | 34            | 0           | 0.000000                | 0.000000  | 0.644749  |
| 2             | 8             | 0           | 1.405512                | 0.000000  | 1.491849  |
| 3             | 8             | 0           | -1.405512               | 0.000000  | 1.491849  |
| 4             | 6             | 0           | 0.000000                | 1.403555  | -0.739710 |
| 5             | 6             | 0           | 0.000000                | -1.403555 | -0.739710 |
| 6             | 6             | 0           | -0.000043               | 0.742898  | -1.908629 |
| 7             | 6             | 0           | 0.000043                | -0.742898 | -1.908629 |
| 8             | 1             | 0           | -0.000034               | 1.263832  | -2.864105 |
| 9             | 1             | 0           | 0.000034                | -1.263832 | -2.864105 |
| 10            | 14            | 0           | 0.000456                | 3.217631  | -0.223511 |
| 11            | 14            | 0           | -0.000456               | -3.217631 | -0.223511 |
| 12            | 6             | 0           | 0.002690                | 4.291370  | -1.778178 |
| 13            | 6             | 0           | -1.552568               | 3.494330  | 0.812538  |
| 14            | 6             | 0           | 1.551321                | 3.492394  | 0.816211  |
| 15            | 6             | 0           | -0.002690               | -4.291370 | -1.778178 |
| 16            | 6             | 0           | 1.552568                | -3.494330 | 0.812538  |
| 17            | 6             | 0           | -1.551321               | -3.492394 | 0.816211  |
| 18            | 1             | 0           | 0.002257                | 5.351664  | -1.496633 |
| 19            | 1             | 0           | 0.891361                | 4.116755  | -2.395793 |
| 20            | 1             | 0           | -0.883890               | 4.116664  | -2.398751 |
| 21            | 1             | 0           | -1.513481               | 4.460874  | 1.328930  |
| 22            | 1             | 0           | -2.454114               | 3.479102  | 0.189320  |
| 23            | 1             | 0           | -1.662410               | 2.703719  | 1.562986  |
| 24            | 1             | 0           | 1.511748                | 4.458293  | 1.333767  |
| 25            | 1             | 0           | 2.454155                | 3.477512  | 0.194847  |
| 26            | 1             | 0           | 1.659298                | 2.700594  | 1.565676  |
| 27            | 1             | 0           | -0.002257               | -5.351664 | -1.496633 |
| 28            | 1             | 0           | -0.891361               | -4.116755 | -2.395793 |
| 29            | 1             | 0           | 0.883890                | -4.116664 | -2.398751 |
| 30            | 1             | 0           | 1.513481                | -4.460874 | 1.328930  |
| 31            | 1             | 0           | 2.454114                | -3.479102 | 0.189320  |
| 32            | 1             | 0           | 1.662410                | -2.703719 | 1.562986  |
| 33            | 1             | 0           | -1.511748               | -4.458293 | 1.333767  |
| 34            | 1             | 0           | -2.454155               | -3.477512 | 0.194847  |
| 35            | 1             | 0           | -1.659298               | -2.700594 | 1.565676  |

## II. Theoretical calculations of 2,5-Bis(trimethylsilyl)selenophene (6)

total energy: =-3371.5616089 hartree (NImag = 0)

| Center<br>Number | Atomic<br>Number | Atomic<br>Type | Coordinates (Angstroms) |           |           |
|------------------|------------------|----------------|-------------------------|-----------|-----------|
|                  |                  |                | X                       | Y         | Z         |
| 1                | 34               | 0              | 0.000000                | 0.000000  | 0.855300  |
| 2                | 6                | 0              | 0.005920                | 1.327722  | -0.480559 |
| 3                | 6                | 0              | -0.005920               | -1.327722 | -0.480559 |
| 4                | 6                | 0              | 0.003502                | 0.714404  | -1.710531 |
| 5                | 6                | 0              | -0.003502               | -0.714404 | -1.710531 |
| 6                | 1                | 0              | 0.006550                | 1.283953  | -2.636760 |
| 7                | 1                | 0              | -0.006550               | -1.283953 | -2.636760 |
| 8                | 14               | 0              | 0.000000                | 3.156367  | -0.068834 |
| 9                | 14               | 0              | 0.000000                | -3.156367 | -0.068834 |
| 10               | 6                | 0              | 0.204948                | 4.141457  | -1.671142 |
| 11               | 6                | 0              | -1.632608               | 3.618125  | 0.770627  |
| 12               | 6                | 0              | 1.427213                | 3.536155  | 1.114905  |
| 13               | 6                | 0              | -0.204948               | -4.141457 | -1.671142 |
| 14               | 6                | 0              | 1.632608                | -3.618125 | 0.770627  |
| 15               | 6                | 0              | -1.427213               | -3.536155 | 1.114905  |
| 16               | 1                | 0              | 0.220260                | 5.217060  | -1.456591 |
| 17               | 1                | 0              | 1.142232                | 3.892584  | -2.181954 |
| 18               | 1                | 0              | -0.618601               | 3.957396  | -2.370873 |
| 19               | 1                | 0              | -1.649669               | 4.682594  | 1.035918  |
| 20               | 1                | 0              | -2.487522               | 3.422436  | 0.113118  |
| 21               | 1                | 0              | -1.786067               | 3.042807  | 1.691174  |
| 22               | 1                | 0              | 1.420871                | 4.592842  | 1.409776  |
| 23               | 1                | 0              | 2.396669                | 3.323777  | 0.649655  |
| 24               | 1                | 0              | 1.362415                | 2.935971  | 2.030315  |
| 25               | 1                | 0              | -0.220260               | -5.217060 | -1.456591 |
| 26               | 1                | 0              | -1.142232               | -3.892584 | -2.181954 |
| 27               | 1                | 0              | 0.618601                | -3.957396 | -2.370873 |
| 28               | 1                | 0              | 1.649669                | -4.682594 | 1.035918  |
| 29               | 1                | 0              | 2.487522                | -3.422436 | 0.113118  |
| 30               | 1                | 0              | 1.786067                | -3.042807 | 1.691174  |
| 31               | 1                | 0              | -1.420871               | -4.592842 | 1.409776  |
| 32               | 1                | 0              | -2.396669               | -3.323777 | 0.649655  |
| 33               | 1                | 0              | -1.362415               | -2.935971 | 2.030315  |

**b. Calculated Electronic Transitions at TD-B3LYP/6-3111++G(d,p)//B3LYP/6-31G(d) Level**

**Table S2.** Calculated Electronic Transitions in 2,5-Bis(trimethylsilyl)selenophene-dioxide (**5**) at TD-B3LYP/6-311++G(d,p)//B3LYP/6-31G(d) Level

| Transition | Energy / nm | Oscillator strength | symmetry  | Assignment (CI expansion coef.)                     |
|------------|-------------|---------------------|-----------|-----------------------------------------------------|
| <b>a</b>   | 340.33      | 0.0000              | Singlet-A | HOMO-1→LUMO (0.70376)                               |
| <b>b</b>   | 324.62      | 0.0779              | Singlet-B | HOMO→LUMO (0.68540) +<br>HOMO-4→LUMO (-0.12175)     |
| <b>c</b>   | 292.89      | 0.0114              | Singlet-A | HOMO-2→LUMO (0.70022)                               |
| <b>d</b>   | 271.51      | 0.0006              | Singlet-B | HOMO-3→LUMO (0.69228)                               |
| <b>e</b>   | 265.93      | 0.0840              | Singlet-B | HOMO-4→LUMO (0.69224) +<br>HOMO→LUMO (0.11411)      |
| <b>f</b>   | 242.97      | 0.0198              | Singlet-A | HOMO-5→LUMO (0.70277)                               |
| <b>g</b>   | 240.49      | 0.0104              | Singlet-B | HOMO-6→LUMO (0.70302)                               |
| <b>h</b>   | 236.30      | 0.0000              | Singlet-A | HOMO-7→LUMO (0.70368)                               |
| <b>i</b>   | 230.99      | 0.0183              | Singlet-B | HOMO-8→LUMO (0.67430) +<br>HOMO-1→LUMO+1 (-0.17608) |

**Table S3.** Calculated Electronic Transitions in 2,5-Bis(trimethylsilyl)selenophene (**6**) at TD-B3LYP/6-311++G(d,p)//B3LYP/6-31G(d) Level

| Transition | Energy / nm | Oscillator strength | symmetry  | Assignment (CI expansion coef.)                                                    |
|------------|-------------|---------------------|-----------|------------------------------------------------------------------------------------|
| <b>a</b>   | 253.33      | 0.0510              | Singlet-A | HOMO-1→LUMO (0.67966) +<br>HOMO→LUMO+11 (-0.11473)                                 |
| <b>b</b>   | 252.66      | 0.2812              | Singlet-B | HOMO→LUMO (0.68540)                                                                |
| <b>c</b>   | 234.69      | 0.0000              | Singlet-A | HOMO-1→LUMO+2 (0.52486) +<br>HOMO-1→LUMO+3 (-0.43661) +<br>HOMO-1→LUMO+8 (0.17132) |
| <b>d</b>   | 234.15      | 0.0050              | Singlet-B | HOMO→LUMO+2 (0.56710) +<br>HOMO→LUMO+3 (-0.38732) +<br>HOMO→LUMO+8 (0.15462)       |
| <b>e</b>   | 230.08      | 0.0000              | Singlet-A | HOMO→LUMO+1 (0.69724)                                                              |

## 6. Details of Solid-State Fluorescence Study

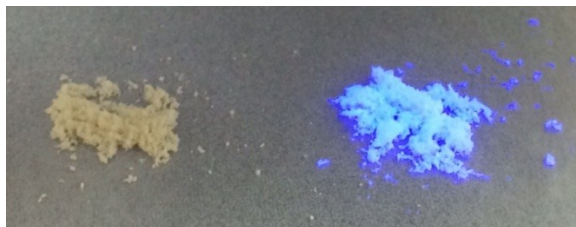

**Fig. S23.** Photograph of powder of selenophene-1,1-dioxide **5** (left) and thiophene-1,1-dioxide **3** (right) upon irradiation of 254 nm light. Due to instability of the compound of **5** the powder was slightly colored.

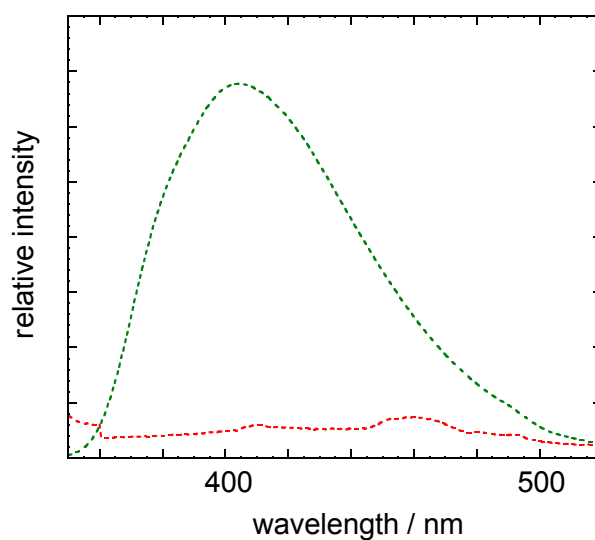

**Fig. S24.** Fluorescence spectra of powder of 2,5-bis(trimethylsilyl)selenophene-1,1-dioxide (**5**, red line) and 2,5-bis(trimethylsilyl)thiophene-1,1-dioxide (**3**, green line) (conditions: 296 K, ex. 308 nm).
